# Supplementary material
Source: HighWire-hosted journal article supplement (https://ejhp.bmj.com/highwire/filestream/150597/field_highwire_adjunct_files/2/ejhpharm-2021-002803supp003_data_supplement.pdf)

Supplemental figure 3 Funnel plots of publication bias of ratio risk for overall response rate in the meta-analysis.

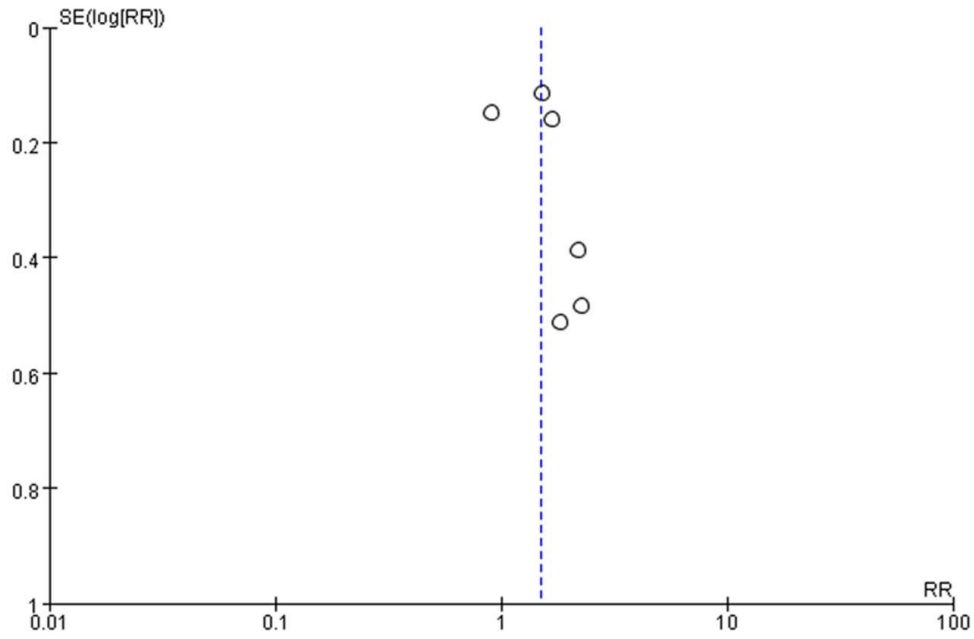

Supplement: ejhpharm-2021-002803supp003_data_supplement.pdf [file ejhpharm-2021-002803supp003_data_supplement.pdf]
